# Supplementary material for: Theoretical investigation of quantum capacitance of Co-doped α-MnO2 for supercapacitor applications using density functional theory
Source: Royal Society of Chemistry journal article supplement (doi:10.1039/d3cp03080f), 2023-01-01
Supplement: d3cp03080f1.pdf [file d3cp03080f1.pdf]

## Theoretical Investigation of Quantum Capacitance of Co-doped $\alpha$ -MnO<sub>2</sub> for Supercapacitor Application using Density Functional Theory

Ariya K Vijayan<sup>1</sup>, Sreehari M. S.<sup>1</sup>, Simran Kour<sup>1</sup>, Saptarshi Ghosh Dastider<sup>1,2</sup>, Krishnakanta Mondal<sup>3</sup>, A. L. Sharma<sup>1\*</sup>

<sup>1</sup>Department of Physics, Central University of Punjab, Bathinda, Punjab, India-151401

<sup>2</sup>Department of Chemistry, Central University of Punjab, Bathinda, Punjab, India-151401

<sup>3</sup>Department of Physics & Astrophysics, University of Delhi, India-110007

\*Corresponding author: [alsharma@cup.edu.in](mailto:alsharma@cup.edu.in)

### Supporting Information

#### 1. Computational Details for Dispersion Correction

To incorporate the effect of dispersion interactions in the formation energy, the semi-empirical method proposed by Grimme (DFT-D2) was used.

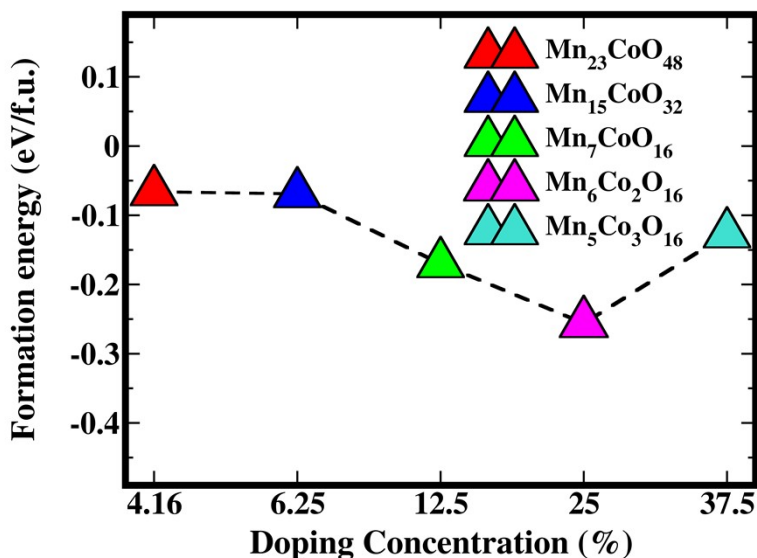

**Fig. S1:** Variation of formation energy using dispersion correction with increasing doping concentration.
